# Supplementary material for: Oligopeptide Signaling through TbGPR89 Drives Trypanosome Quorum Sensing
Source: PubMed Central journal article supplement (PMC6333907; doi:10.1016/j.cell.2018.10.041), 2019-01-10
Supplement: mmc5.pdf [file mmc5.pdf]

| <b>Oligonucleotides</b>                                              |                                                 |               |
|----------------------------------------------------------------------|-------------------------------------------------|---------------|
| Sequence                                                             | Amplicon                                        | Name          |
| TCTAGAGGATCCTCTTCTAAGGTGGGGTGTGC                                     | pZJM-GPR89 forw                                 | GPCR RNAi 2 F |
| CTCGAGCCCGGGCTAACTGCCGACGAAGAAG                                      | pZJM-GPR89 rev                                  | GPCR RNAi 2 R |
| ACTAGTATGCTGTTGAAACTTGGCGCT                                          | pDEX-GPR89TY forw                               | OL24          |
| TCTAGATTAATCTGCGGCGGCACA                                             | pDEX-GPR89TY rev                                | OL25          |
| TCTAGAGAAGAAGGCTCCCAT                                                | pDEX-Δ415-483TY                                 | OL32          |
| GTCGACTATGTACGGAGTAATAA                                              | 5' UTR GPCR forw                                | OL59          |
| AAGCTTAGCCGTGGGGGACGC                                                | 5' UTR GPCR rev                                 | OL60          |
| GGATCCTGGGAATAACATTT                                                 | 3' UTR F forw                                   | OL61          |
| GCGGCCGC TTGTCTCTGGCCACCCA                                           | 3' UTR rev                                      | OL62          |
| GGCCGGCCATGCTGTTGAAACTTGGCGCT                                        | FORW GPCR TY for                                | OL67          |
| AGATCTTTAGTCAAGTGGATCTTGTT                                           | Rev GPCR TY for                                 | OL68          |
| CAGCTTAGTGAGCGCATCAAGAGCCAATTTAGTATC<br>CAGACACTGCGCTGC              | GPR89 N-<br>glycosylation site<br>mutation forw | MUT1          |
| GCAGCGCAGTGTCTGGATACTAAATTGGCTCTTGAT<br>GCGCTCACTAAGCTG              | GPR89 N-<br>glycosylation site<br>mutation rev  | MUT2          |
| AAGCTTATGAAAACACCCTCAC                                               | pDEX-YJDL-TY forw                               | OL70          |
| TCTAGAATCGTTGCTCTCCTGTATC                                            | pDEX-YJDL-TY rev                                | OL71          |
| GGATCCATGAAAACACCCTCACA                                              | pET28a-YJDL forw                                | OL76          |
| AAGCTTATCGTTGCTCTCCTGTATC                                            | pET28a-YJDL rev                                 | OL77          |
| TTGTCTTCGCTTTATCGACGCACGCGTTCATCCTGC<br>TGCT                         | pET28a-GPR89<br>TYR48 mutant forw               | OL78          |
| AGCAGCAGGATGAACGCGTGCCTCGATAAAGCGAA<br>GACAA                         | pET28a-GPR89<br>TYR48 mutant rev                | OL79          |
| AAGCTTATGAAGCCTACAAAAC                                               | pDEX-PGPty forw                                 | OL80          |
| TCTAGATTCAACTGCTTCCAT                                                | pDEX-PGPty rev                                  | OL81          |
| AAGCTTATGTCGAGGATGT                                                  | BIP for pDEX-<br>BIP+PGP forw                   | OL84          |
| ACTAGTCCCGCCAACCTCGCT                                                | BIP for pDEX-<br>BIP+PGP rev                    | OL85          |
| ACTAGTATGCGCCTCGCTTA                                                 | pDEX-POPty                                      | OL88          |
| TCTAGAGTCTGTCCACTGGGC                                                | pDEX-POPty                                      | OL89          |
| TCTAGAACTAGTGAGGCGGGCCTGGTC                                          | 5' end gene rev for<br>6xHA insertion           | OL55          |
| TCTAGACGGTCCGCGGGGAGTGG                                              | 3' end gene forw for<br>6xHA insertion          | OL56b         |
| ACTAGTCGATCCGGACCAAGT                                                | 6xHA forw                                       | OL57b         |
| TCTAGAGGCAGGATCTTTACCTTG                                             | 6xHA rev                                        | OL58          |
| GCGCTAATGGGCTTTGCCGCCCTTTATTGACCCG<br>GTG                            | pDEX-YjdL A388E<br>mutant mutagenesis<br>primer | YJDL388F      |
| CACCGGGTCAATAAAGAGGGCGGCAAAGCCCATTA<br>GCGC                          | pDEX-YjdL A388E<br>mutant mutagenesis<br>primer | YJDL388R      |
| GATTACACAACAGCTAAGCGTGGCAAAGCGGTATAA<br>TGCAGACCTGCTGCA              | CRISPR cassette<br>amplification pPOTv6         | KO15300F      |
| CCAGTAATACTTGTTGTGGCCTTCATCCCTCCAATTT<br>GAGAGACCTGTGC               | CRISPR cassette<br>amplification pPOTv6         | KO1530R:      |
| GAAATTAATACGACTCACTATAGGTGTGAGTGAGCT<br>GGGCTGGCGTTTTAGAGCTAGAAATAGC | Guide RNA for GPR89                             | 1530sgRNA 5'  |
| gaaattaatacactcactataggTATGCTTATATGTGCTTGTG<br>gttttagactagaaatagc   | Guide RNA for GPR89                             | 1530sgRNA 3'  |
